# Supplementary material for: Identification of purine biosynthesis as an NADH-sensing pathway to mediate energy stress
Source: PubMed Central journal article supplement (PMC9672040; doi:10.1038/s41467-022-34850-0), 2022-11-17
Supplement: 41467_2022_34850_MOESM3_ESM.pdf [file 41467_2022_34850_MOESM3_ESM.pdf]

**File Name: Supplementary Data 1**

**Description:** Distribution of Robust Rank Aggregation (RRA) scores in genome-wide negative CRISPR/Cas9 screens (GeCKOV2 library and Brunello library);

**File Name: Supplementary Data 2**

**Description:** Targeted metabolomics unprocessed data determined by LC-MS in HeLa cells expressing inducible Tet-on *LbNOX*, *EcSTH* or *EcSTH-LbNOX* cultured with Dox (0.1 µg/ml) for 24 h.
